# Supplementary material
Source: PubMed Central journal article supplement (PMC8456186)
Supplement: mmc1.pdf [file mmc1.pdf]

**The American Journal of Human Genetics, Volume 108**

**Supplemental information**

**Brain-trait-associated variants impact**

**cell-type-specific gene regulation**

**during neurogenesis**

**Nil Aygün, Angela L. Elwell, Dan Liang, Michael J. Lafferty, Kerry E. Cheek, Kenan P. Courtney, Jessica Mory, Ellie Hadden-Ford, Oleh Krupa, Luis de la Torre-Ubieta, Daniel H. Geschwind, Michael I. Love, and Jason L. Stein**

Figure S1

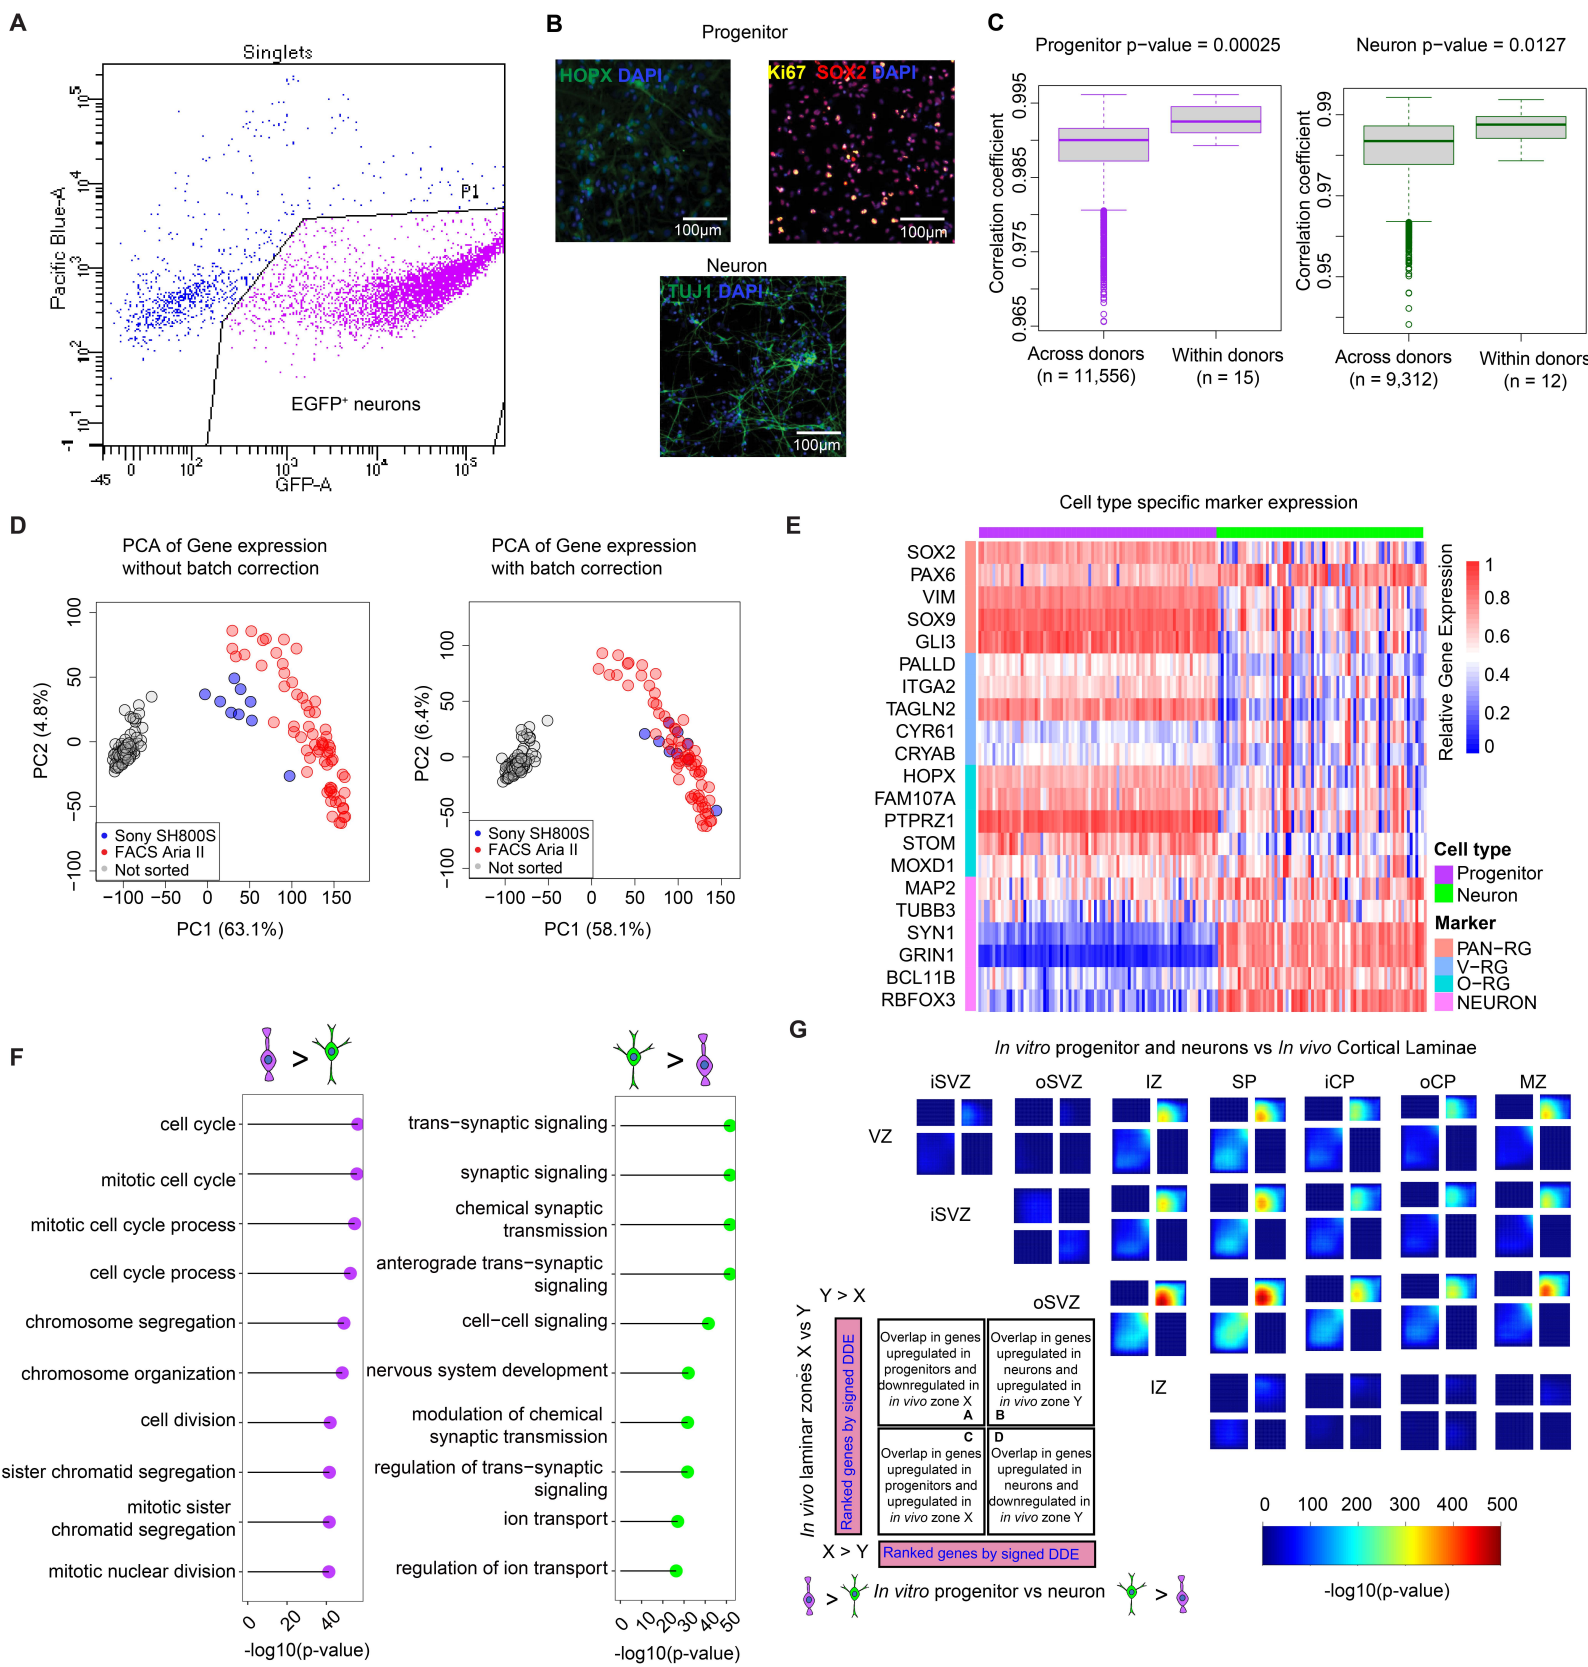

**Figure S1**, related to Figure 1: Pre-processing RNA-seq data and evaluation of the fidelity of *in vitro* cell-type specific system.

**(A)** Flow cytometry results showing sorting of live EGFP positive neurons in pink. The y-axis marks fluorescence from a live/dead stain (annexin V/SYTOX) and the x-axis marks fluorescence from GFP.

**(B)** Immunolabeling indicates that undifferentiated progenitor cultures were positive for outer radial glia marker HOPX in green, proliferation marker Ki67 in yellow and pan-radial glia marker SOX2 in red, and neurons from 8 week differentiated cultures were positive for the neuronal marker TUJ1 (scale bar is 100  $\mu$ m, DAPI in blue).

**(C)** Replicate correlation of RNA-seq libraries across donors and within donors. Gene expression profiles were more correlated between libraries generated from the same donor thawed at different times as compared to libraries across different donors for both progenitors (left, p-value=0.00025) and neurons (right, p-value=0.0127).

**(D)** Principal component analysis (PCA) before and after batch correction of neuron for the machine (Sony SH800S in blue, FACS Aria II in red, progenitors not sorted in grey) used for sorting.

**(E)** Heatmap showing cell-type specific expression of literature-based progenitor (PAN-RG: Pan-radial glia, V-RG: ventricular radial glia, O-RG: outer radial glia) and neuronal markers listed on the y-axis. The x-axis indicates progenitor (purple) or neuron (green) cells from each donor. The color of the heatmap indicates the relative gene expression normalized for each gene between 0 and 1.

**(F)** Gene ontology (GO) analysis showing pathways enriched for genes upregulated in progenitors (left, in purple), and for genes upregulated in neurons (right, in green). The x-axis shows adjusted  $-\log_{10}(\text{p-values})$  for enrichment and each GO term is listed in the y-axis.

**(G)** Comparison of the transitions between mitotic and postmitotic regions of *in vivo* cortical laminae in the developing cortex and *in vitro* progenitor and neurons with rank-rank hypergeometric overlap (RRHO) maps. The extent of overlap between *in vivo* and *in vitro* transcriptome was represented by each heatmap colored based on  $-\log_{10}(\text{p-value})$  from a hypergeometric test. Each map shows the extent of overlapped upregulated genes in the bottom left corner, whereas shared downregulated genes are displayed in the top right corners (ventricular zone - VZ; inner and outer subventricular zone - i/oSVZ, intermediate zone - IZ; subplate - SP; inner and outer cortical plate - i/oCP, marginal zone - MZ).

Figure S2

A

Local eQTL analysis

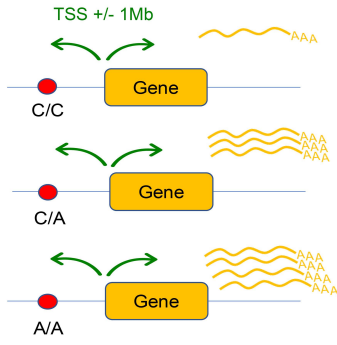

B

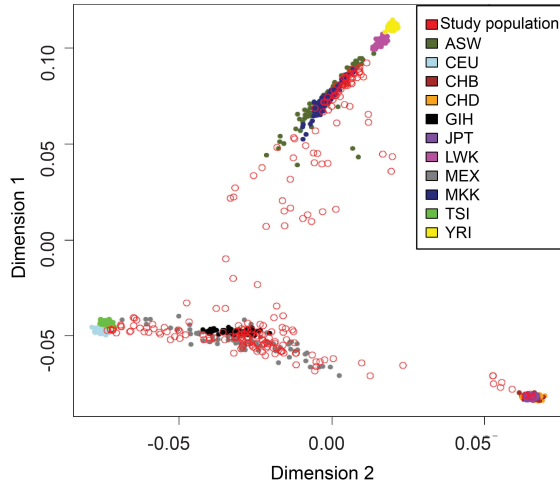

C

|                                                                            | Progenitor $\lambda_{GC}$ | Neuron $\lambda_{GC}$ |
|----------------------------------------------------------------------------|---------------------------|-----------------------|
| No control                                                                 | 1.04                      | 1.01                  |
| Control for 10 PCs of global expression                                    | 1.11                      | 1.05                  |
| Control for 10 global genotype PCs + 10 PCs of global expression           | 1.04                      | 1.02                  |
| Control for 10 global genotype PCs + 10 PCs of global expression + kinship | 1.028                     | 1.007                 |

D

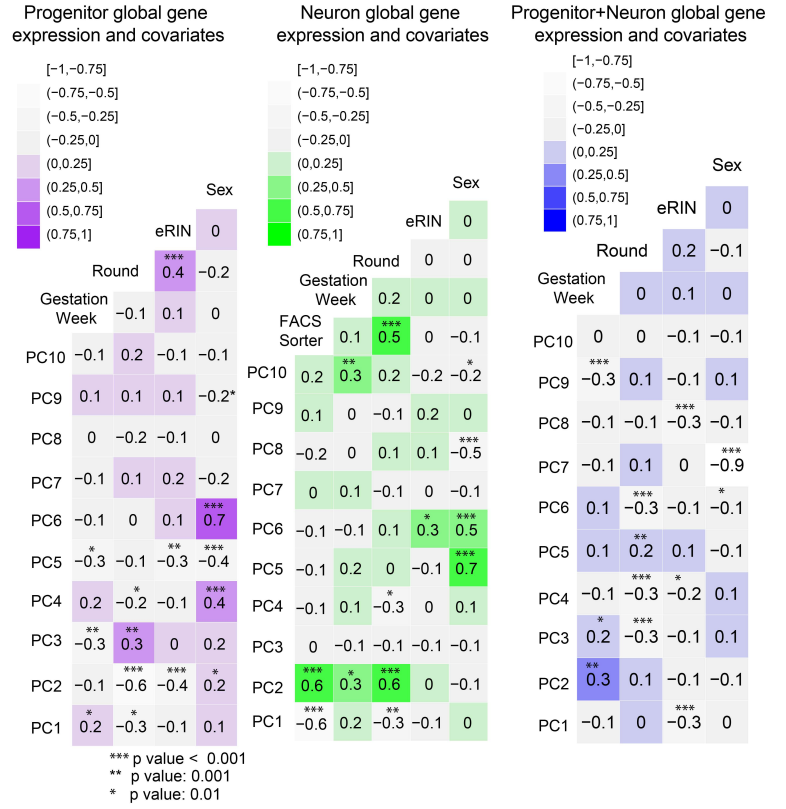

E

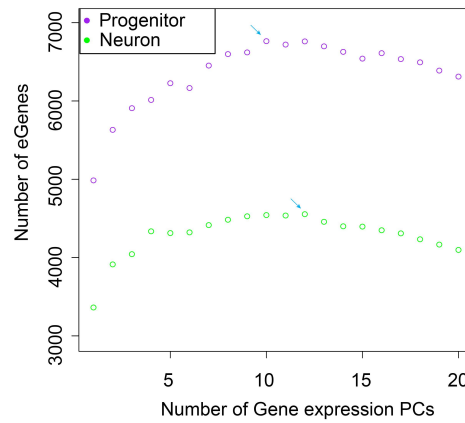

**Figure S2**, related to Figure 1, Figure 2 and Methods: Local eQTL and the detection of covariates for eQTLs.

**(A)** A schematic showing that variants within +/- 1MB cis window from the transcription start site (TSS) of each gene were tested for the association with gene expression.

**(B)** Multidimensional scaling (MDS) of global genotypes showing the multi-ancestry donors in our study. MDS1 vs MDS2 values plotted where each red circle represents a unique donor in our study and each different color represents different ancestry from HapMap3 (ASW: African ancestry, CEU:Northern and Western European ancestry, CHB: Han Chinese ancestry, CHD: Chinese in metropolitan Denver, GIH: Gujarati Indians in Houston, JPT: Japanese in Tokyo, LWK: Luhya in Webuye, MEX:Mexican ancestry, MKK: Maasai in Kinyawa, TSI: Toscani in Italy, YRI: Yoruba in Ibadan).

**(C)** Comparison of genomic inflation factor ( $\lambda_{GC}$ ) without controlling for population structure and technical confounders (no control), only controlling for technical confounders by adding global gene expression PCs, controlling for both population structure (10 MDS of global genotype) and technical confounders, and controlling for kinship matrix in addition to the previous covariates.

**(D)** Correlation of technical confounders with the top 10 principal components of gene expression in progenitor, neurons and all data (asterisk indicates significant correlation).

**(E)** Covariate selection analysis for eQTLs with number of eGene vs. number of global gene expression PCs (progenitors in purple, neurons in green). Blue arrows indicate the number of PCs used in each dataset.

Figure S3

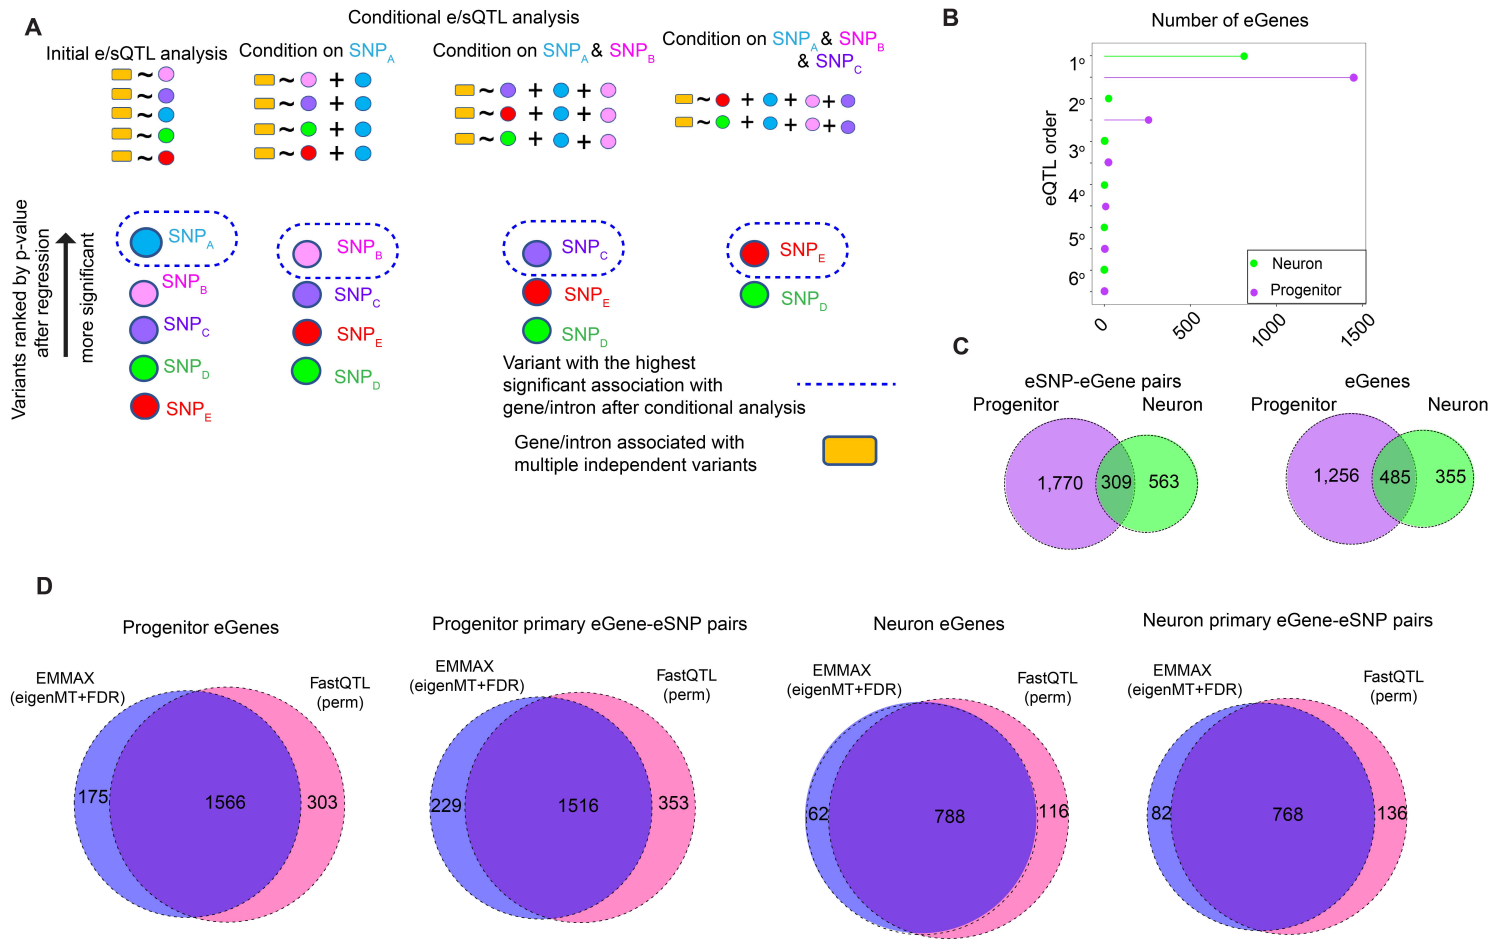

**Figure S3**, related to Figure 2 and 3: Conditional QTL analysis and comparison of linear mixed effects models vs standard linear models.

**(A)** A schematic showing the conditional e/sQTL procedure. Conditionally independent SNPs were found conditioning on the genetic variant with the most significant association, and iteratively applying the same algorithm until there were no further significant associations with local variants.

**(B)** Number of eGenes on the x-axis regulated by the number of conditionally independent eSNPs on the y-axis indicated by eQTL order (left).

**(C)** LD-based overlap between progenitor and neuron eQTLs for eSNP-eGene pairs and eGenes.

**(D)** Comparison of eGenes and primary eGene-eSNP pairs detected by EMMAX followed by eigenMT-FDR and FastQTL followed by adaptive permutation.



Figure S4

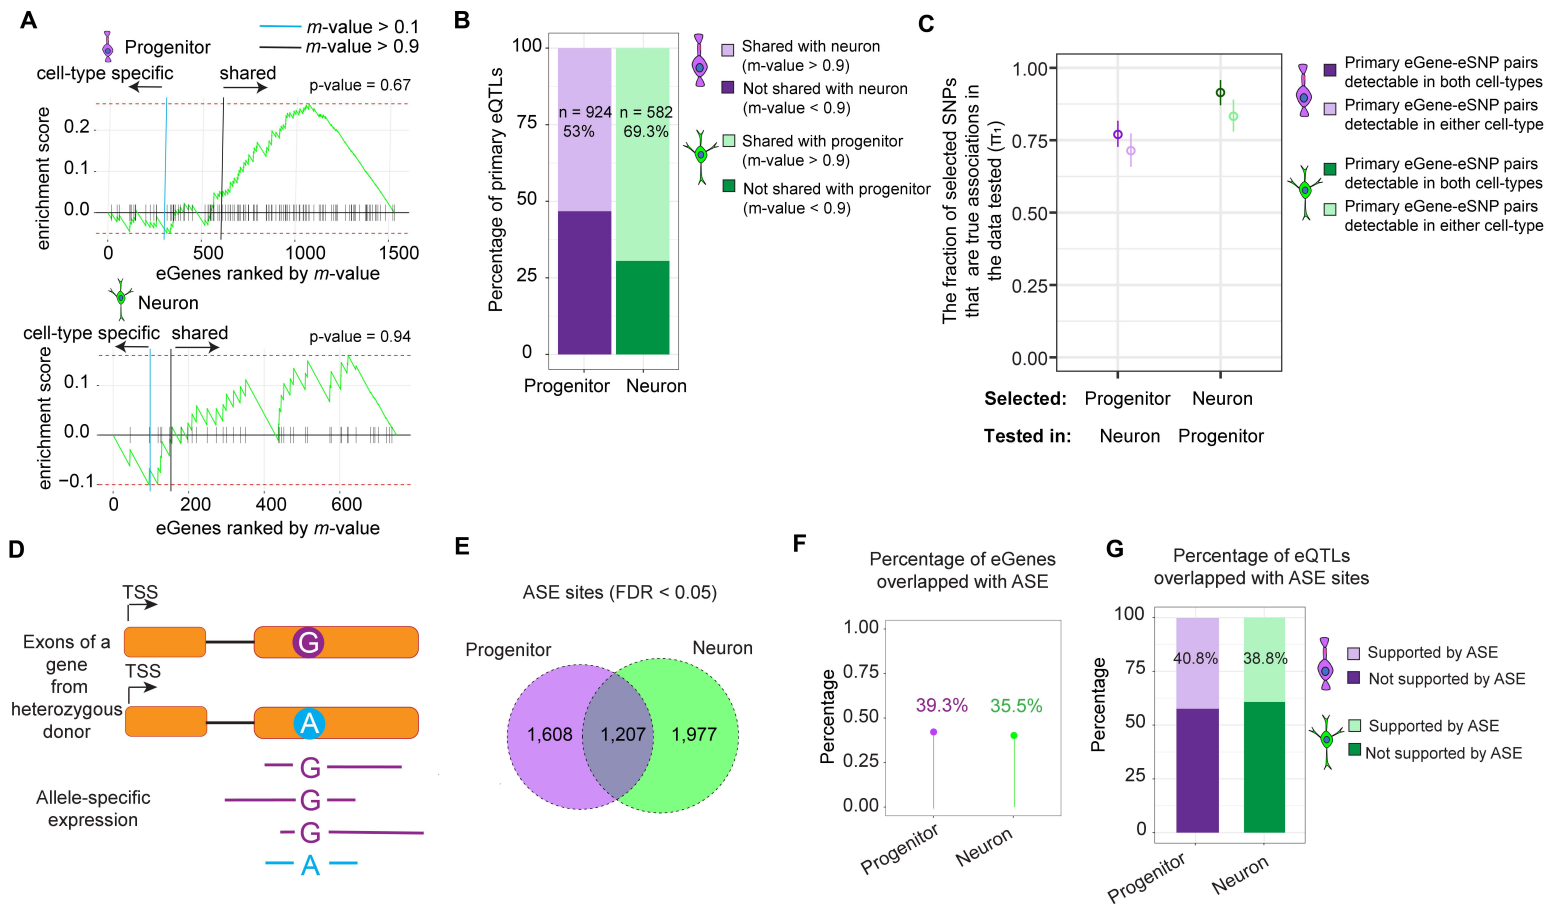

**Figure S4**, related to Figure 2: Cross cell-type specific eQTL comparison and ASE analysis.

**(A)** Gene set enrichment test for cell-type specific eGenes in genes with discordant expression between our *in vitro* culture and the *in vivo* brain. Enrichment p-values are shown. Blue vertical lines indicate genes with *m*-value lower than 0.1 and black vertical lines indicate genes with *m*-value higher than 0.9.

**(B)** Posterior probability of shared effect size (*m*-value) across cell-types for *m*-value > 0.9.

**(C)** The fraction of progenitor/neuron primary eGene-eSNP pairs that are true associations ( $\pi_1$ ) in neuron/progenitor eQTLs detectable in both cell-types or either cell-types. 95% upper and lower confidence interval are shown.

**(D)** A schematic illustrating allele specific expression (ASE) in a heterozygous individual for a variant of interest.

**(E)** Overlap between progenitor and neuron specific ASE sites.

**(F)** Overlap between eGenes and genes with ASE (progenitors in purple, neurons in green).

**(G)** Overlap between cell-type specific eSNPs and ASE sites (progenitors in purple, neurons in green).

Figure S5

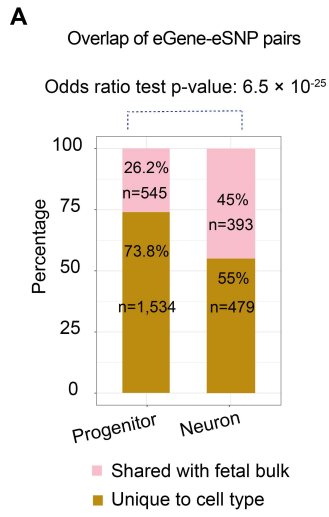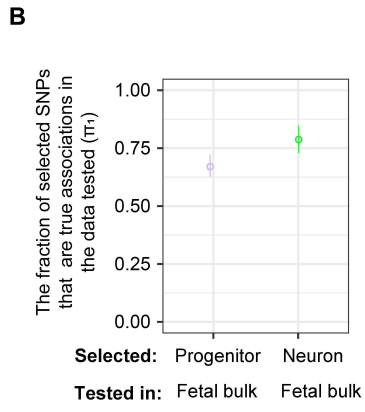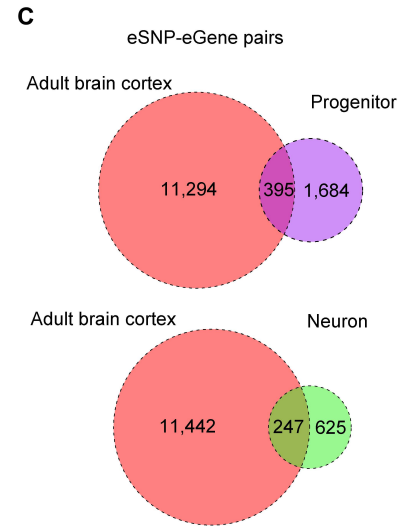

**Figure S5**, related to Figure 2: Cell-type and temporal specificity of eQTLs.

**(A)** LD-based overlap percentage of cell-type specific eSNP-eGene pairs shared (pink) with fetal bulk eQTLs (variants with LD  $r^2 > 0.8$  were considered as the same loci). Odds ratio test p-value is shown.

**(B)** The fraction of progenitor/neuron primary eGene-eSNP pairs that are true associations ( $\pi_1$ ) in fetal bulk eQTLs, subset to genes detectable in either cell-type specific and fetal bulk data. 95% upper and lower confidence interval are shown.

**(C)** LD-based overlap between progenitor/neuron eQTLs and adult brain cortex eQTLs for eSNP-eGene pairs.

Figure S6

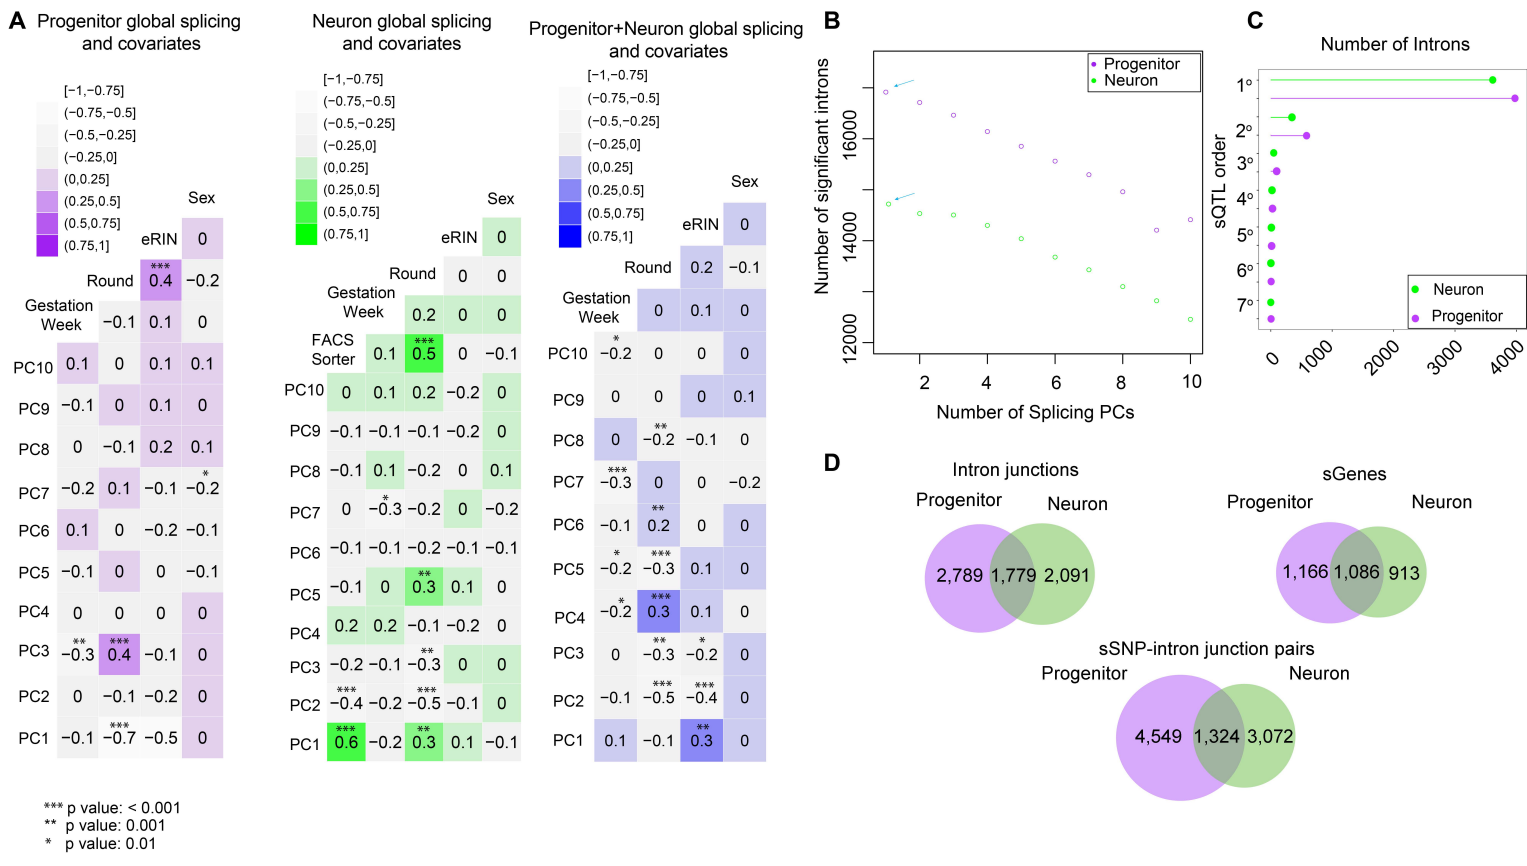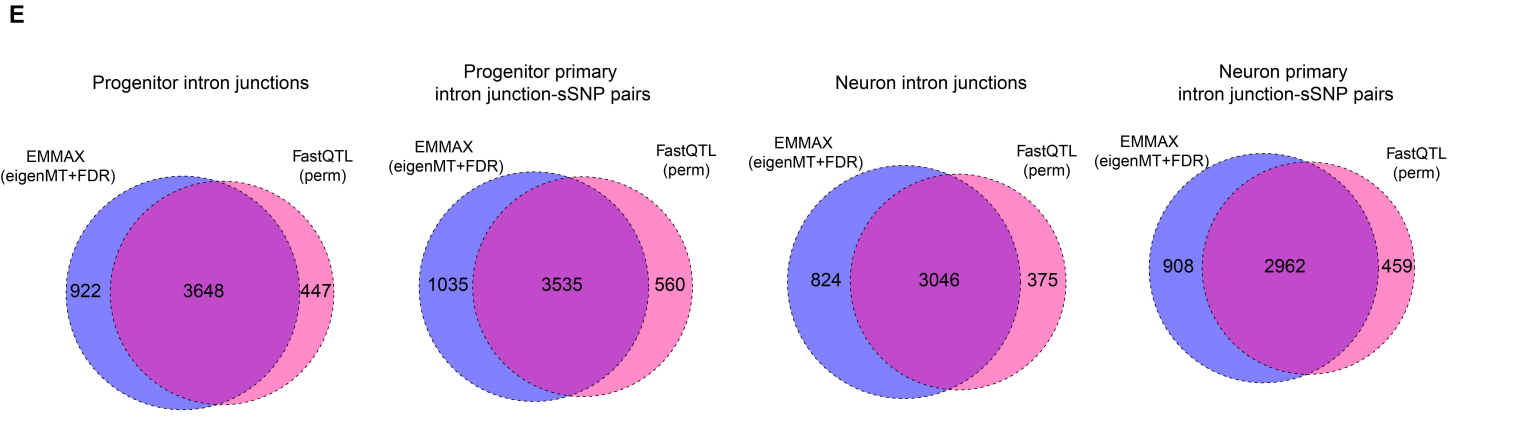

**Figure S6**, related to Figure 3: Cell-type specific sQTL and comparison of linear mixed effects models vs standard linear models

**(A)** Correlation of technical confounders with the top 10 principal components of global splicing in progenitor, neurons and all data (asterisk indicates significant correlation).

**(B)** Covariate selection analysis for sQTLs with number of significant intron vs. number of global splicing PCs (right, progenitors in purple, neurons in green). Blue arrows indicate the number of PCs used in each dataset.

**(C)** Number of intron junctions on the x-axis regulated by the number of conditionally independent sSNPs on the y-axis indicated by sQTL order.

**(D)** LD-based overlap of intron junctions, sGenes harboring intron junctions, and sSNP-intron junction pairs for progenitor vs neuron sQTLs.

**(E)** Comparison of intron junctions and primary intron junction-sSNP pairs detected by EMMAX followed by eigenMT-FDR and FastQTL followed by adaptive permutation.

Figure S7

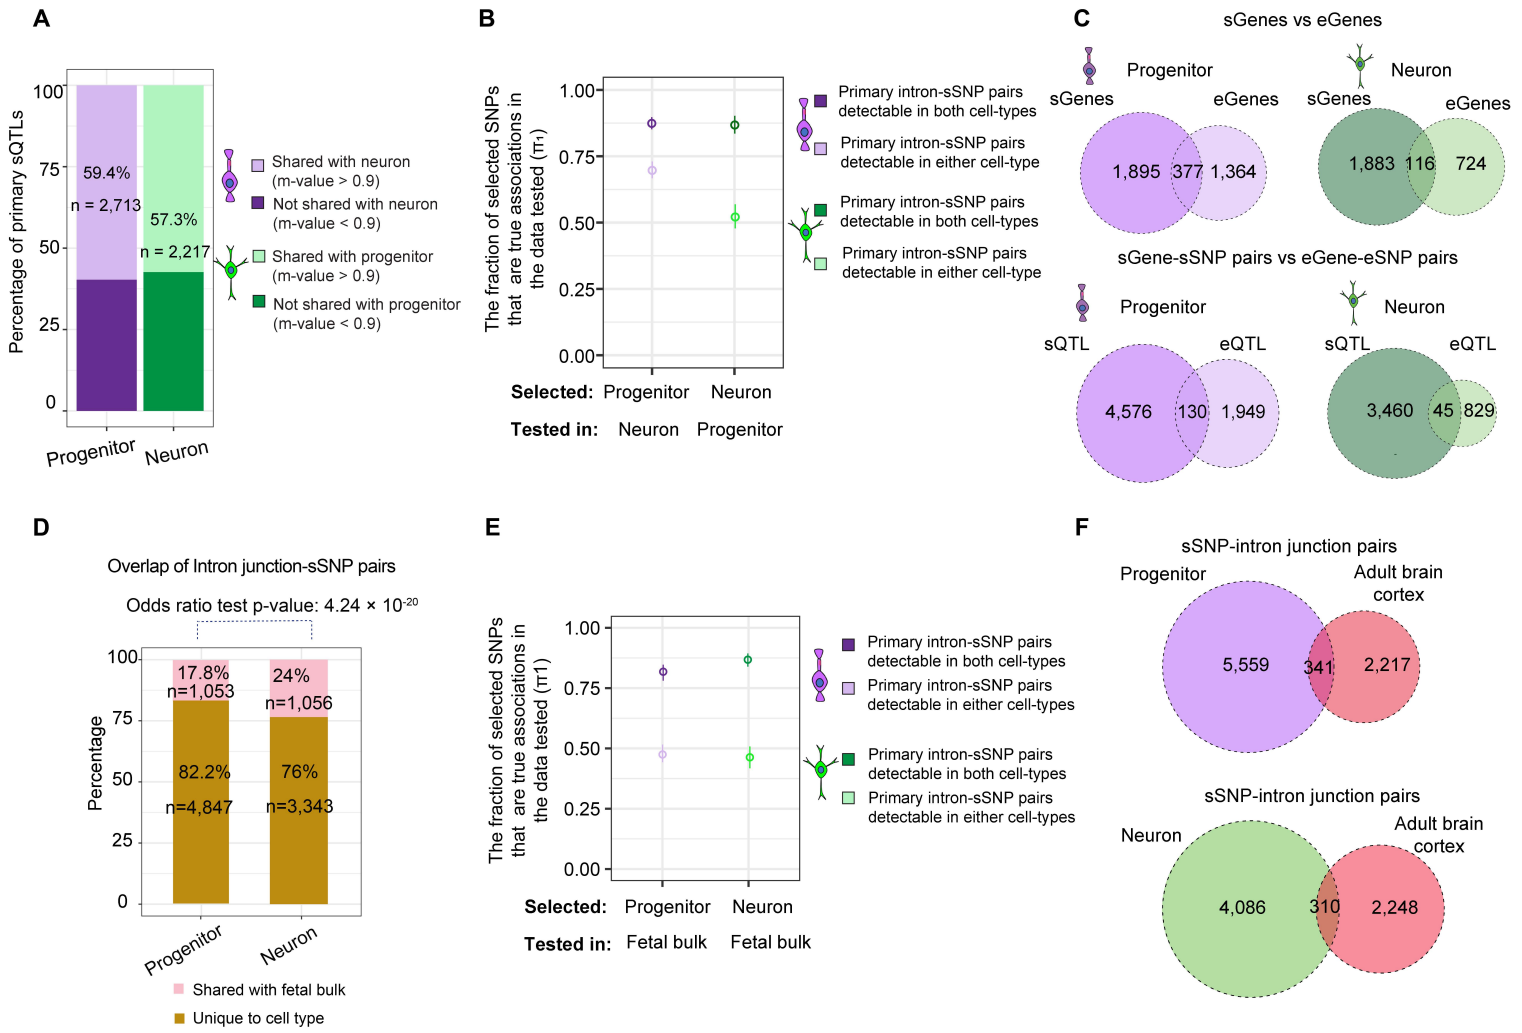

**Figure S7**, related to Figure 3: Cell-type and temporal specificity of sQTLs.

**(A)** Posterior probability of shared effects across cell-type specific sQTLs with  $m$ -value  $> 0.9$ .

**(B)** The fraction of progenitor/neuron primary intron-sSNP pairs that are true associations ( $\pi_1$ ) in neuron/progenitor sQTLs detectable in both or either cell-types. 95% upper and lower confidence interval are shown.

**(C)** Comparison of cell-type specific sQTL vs eQTLs, progenitor in purple and neuron in green. Overlap between sGenes and eGenes, upper panel; LD-based overlap between sGene-sSNP and eGene- eSNP pairs, lower panel.

**(D)** LD-based overlap percentage of cell-type specific sSNP-intron junction pairs shared (pink) with fetal bulk sQTLs (variants with LD  $r^2 > 0.8$  were considered as the same loci). Odds ratio test  $p$ -value is shown.

**(E)** The fraction of progenitor/neuron primary intron-sSNP pairs that are true associations ( $\pi_1$ ) in fetal bulk sQTLs detectable in both or either cell-type specific and fetal bulk data. 95% upper and lower confidence interval are shown.

**(F)** LD-based overlap between progenitor (in purple)/neuron (in green) sQTLs and adult brain cortex sQTLs (in red) for intron junction-sSNP pairs.



Figure S8

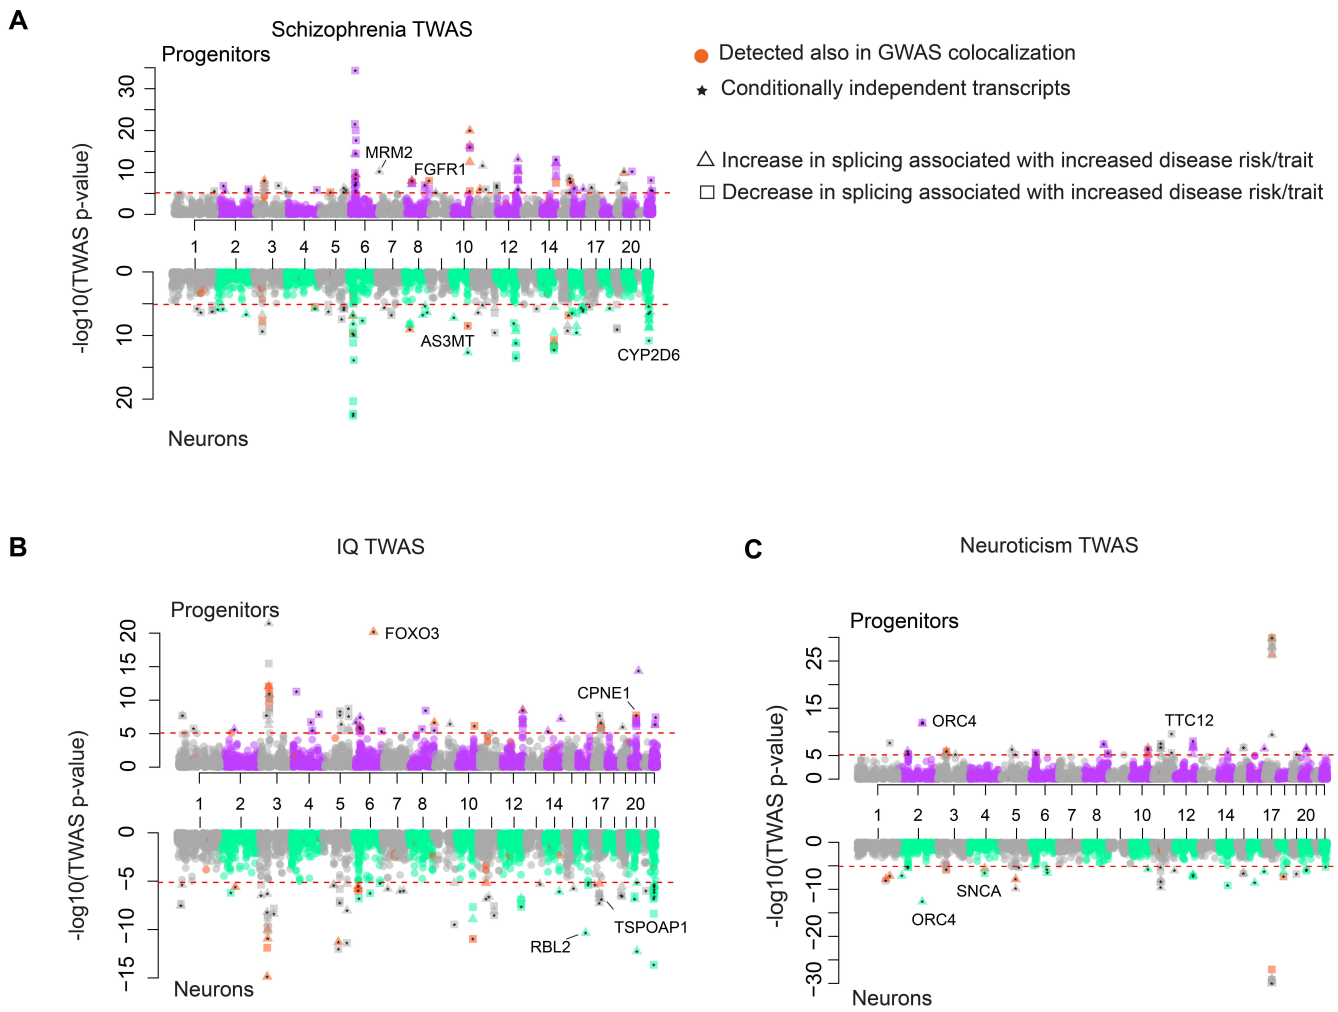

**Figure S8**, related to Figure 6: Prediction of differential alternative splicing events during human brain development via TWAS.

**(A)** Manhattan plots for schizophrenia TWAS for progenitors (purple-grey, top) and neurons (green-grey, bottom) where LD matrix was calculated based on a European population. Each dot shows the  $-\log_{10}(\text{TWAS p-value})$  for each intron junctions on the y-axis, introns were color-coded based on discovery also in colocalization analysis (orange), and being jointly independent (asterisk), where positively and negatively correlated splicing represented by triangle and square, respectively.

**(B)** Manhattan plots for IQ TWAS with graphic design described in A.

**(C)** Manhattan plots for Neuroticism TWAS with graphic design described in A.

Figure S9

**A**

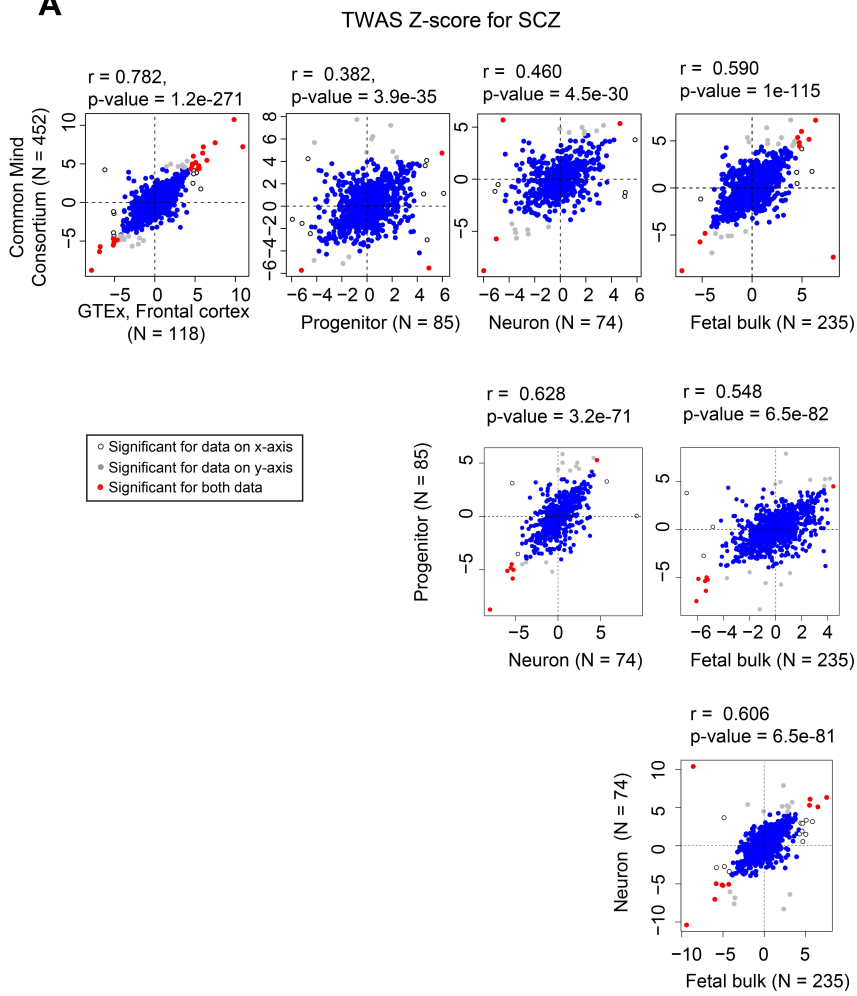

**B**

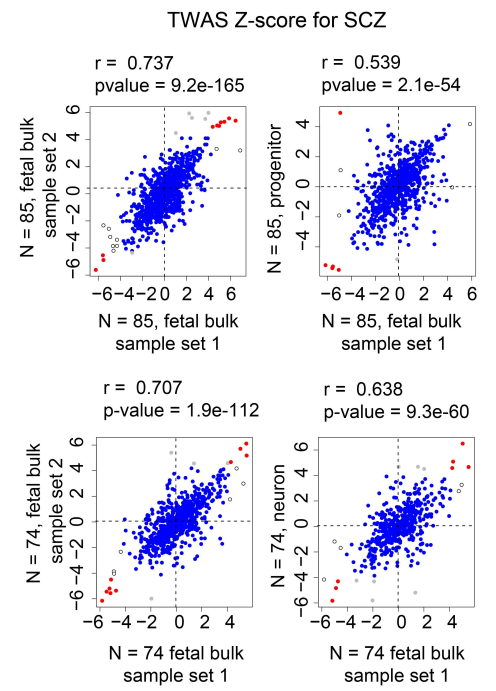

**Figure S9**, related to Figure 6: Evaluation of the impact of sample size on TWAS results.

**(A)** Comparison of TWAS Z-score for SCZ performed either with CMC adult brain eQTL data (N = 452) and with GTEx adult brain eQTL data (N = 118), or cell-type specific and fetal bulk eQTL data. The genes that were significant for using both datasets are colored in red, for the data on the x-axis shown in white, and for the data on the y-axis in grey.

**(B)** Comparison of TWAS Z-score for SCZ performed either with fetal bulk eQTL data downsampled for progenitor eQTL sample size (N = 85), or for neuron eQTL sample size (N = 74).

Figure S10

**A**

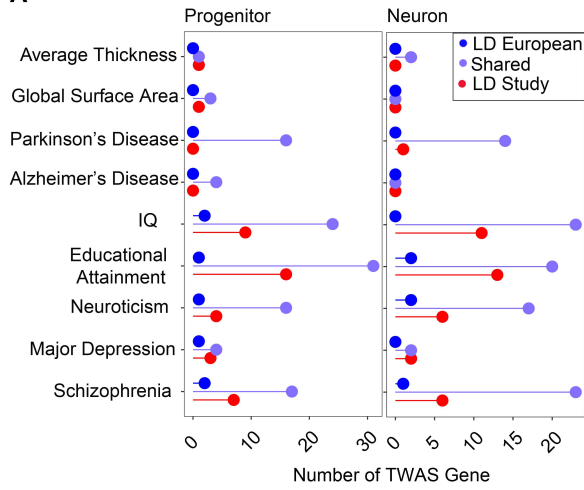

**B**

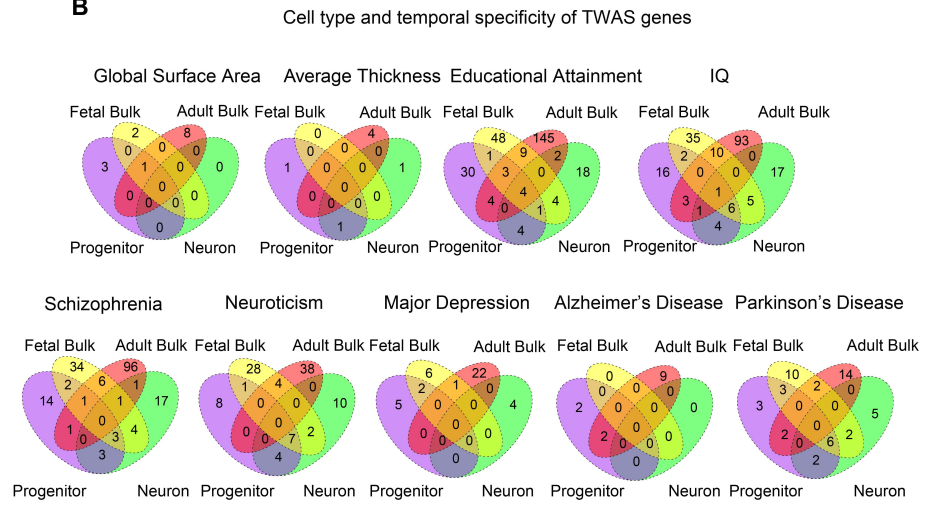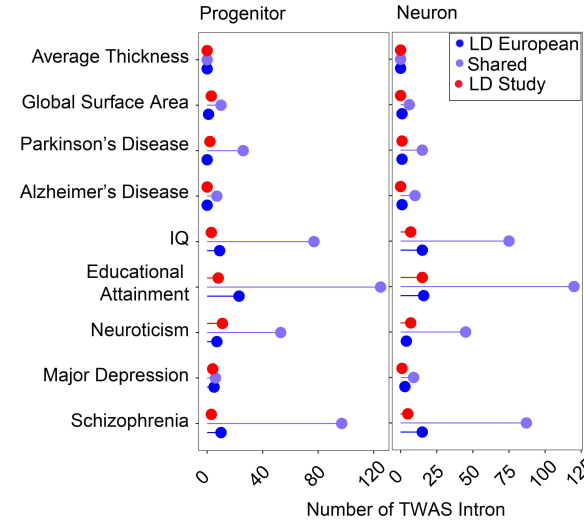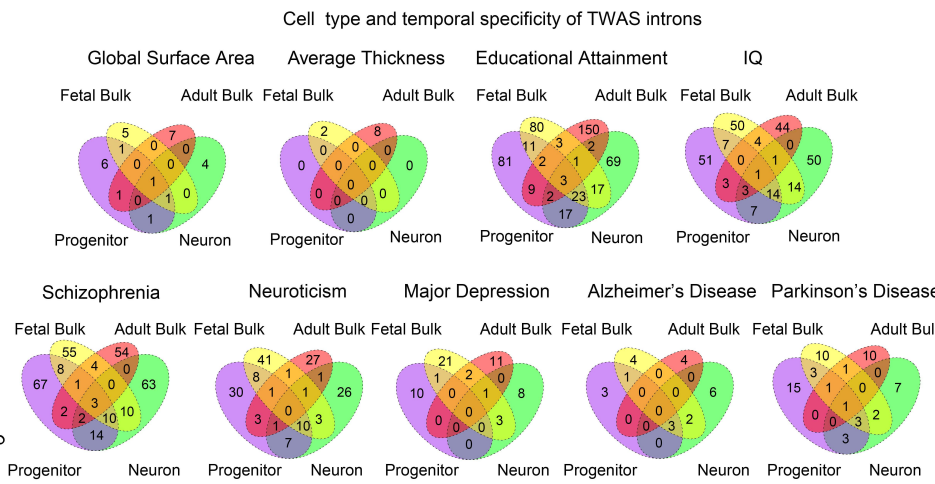

**C**

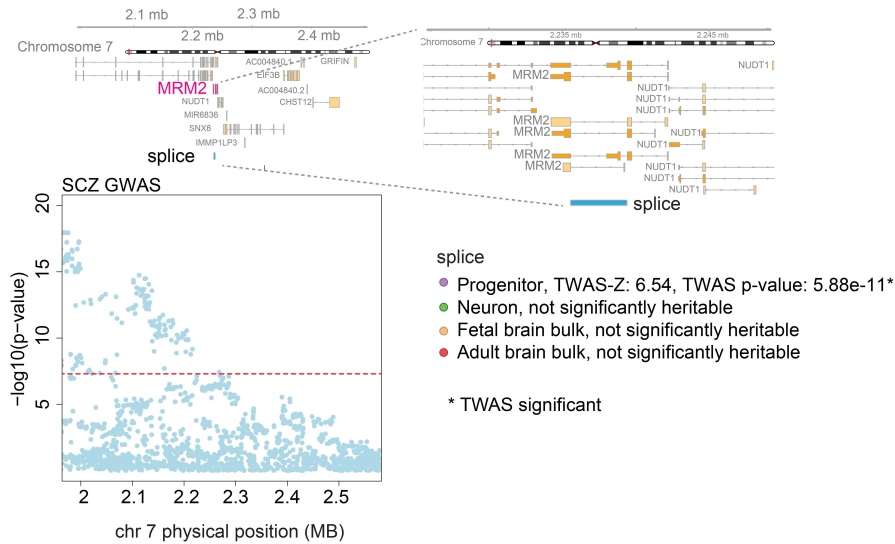

**Figure S10**, related to Figure 6: Cell-type/temporal specificity of TWAS genes and introns.

**(A)** Comparison of TWAS genes performed by using different LD matrices based on European (LD European) and population included in our QTL study (LD Study) (upper plot). Comparison of TWAS introns performed by using different LD matrices based on European (LD European) and population included in our QTL study (LD Study) (lower plot).

**(B)** Overlap of cell-type specific TWAS genes (from the analysis where LD was estimated from European population) with fetal brain bulk and adult brain bulk TWAS genes (upper plot). Overlap of cell-type specific TWAS introns (from the analysis where LD was estimated from European population) with fetal brain bulk and adult brain bulk TWAS introns (lower plot).

**(C)** SCZ TWAS results for intron junction (splice, chr7:2235564-2239418) of the *MRM2* gene, regional association of variants, that were used to test polygenic impact on introns to SCZ are shown on the left. Gene-model for *MRM2* is shown on the right with matching introns and statistics from each TWAS study shown at the bottom (red line used for genome-wide significant threshold of  $5 \times 10^{-8}$ ).

### Supplementary Table legends

**Table S1**, related to Figure 1-2 and S1:

Sheet 1: Differential gene expression analysis progenitor vs neurons (FDR < 0.05): gene is the ensemblID, logFC is the expression fold change logFC > 0 indicates a gene more frequently expressed in neurons than progenitors; AveExpr is the average vst normalized expression of all samples. t is the expression fold change divided by its standard error<sup>37</sup>. P.Value is the nominal p-value from the testing differential expression; adj.P.Val is the Benjamini-Hochberg FDR adjusted p-value; B is log-odds for the differentially expressed gene in limma.

**Table S2**, related to Figure 2 and S2-4:

Sheet 1-3: List of cell-type specific conditionally independent eQTLs for progenitor, neurons and fetal bulk: snp is the variant tested in QTL; beta is the beta coefficient; pvalue is the nominal p-value; gene is the ensemblID of the gene tested; rank is the eQTL order; chr is the chromosome number, BP is the genomic position of the variant; cond.beta is the beta after conditional analysis; cond.pval is the p-value after conditional analysis; A1 is the effect allele. rsid is the rs id of the allele matching in 1000 Genome Phase 3 (NA if rsid is not available for the genomic position of the variant in 1000 Genome data; \* if multiple variants exist for the same genomic position).

Sheet 4-5: Allele specific expression analysis (FDR < 0.05). SNP is the variant tested for allele specific expression analysis, baseMean is the average of the normalized count values divided by size factors from DESeq2<sup>36</sup>; log2FoldChange is the expression fold change logFC > 0 indicates reads more frequently expressed in donors with reference allele than donors with alternative allele; lfcSE is the standard error estimate for log2FoldChange; stat is the test statistics performed in DESeq2; pvalue is the nominal p-value from the testing differential expression; padj is the Benjamini-Hochberg FDR adjusted p-value; refAllele is the reference allele of the variant.

**Table S3**, related to Figure 3 and S6-7:

Sheet 1: Differential splicing analysis progenitor vs neurons (FDR < 0.05): intron is the splice junction, logFC is the expression fold change logFC > 0 indicates a gene more frequently expressed in neurons than progenitors; AveExpr is the average vst normalized expression of all samples. t is the expression fold change divided by its standard error<sup>37</sup>. P.Value is the nominal p-value from the testing differential expression; adj.P.Val is the Benjamini-Hochberg FDR adjusted p-value; B is log-odds for the differentially expressed intron in limma; gene is the gene symbol of the gene that introns junctions overlap with; ensemblID is the ensemblID of that gene.

Sheet 2-4: List of cell-type specific conditionally independent sQTLs for progenitor, neuron and fetal bulk sQTLs: snp is the variant tested; beta is the beta coefficient, pval is the nominal p-value; intron is the intron junction as chromosome:start position:end position format; rank is the order of sQTL after conditional analysis; chr is the chromosome, start is the start position of the junction; end is the end position of the junction; clusterID is the cluster identified from Leafcutter, cluster is the clusterID combined with chromosome number, verdict is the annotation status; gene is the gene symbol of the gene that introns junctions overlap with; ensemblID is the ensemblID of that gene; transcripts is the transcripts where intron junction overlap with; constitutive.score: degree of the junction shown in each transcript; cond.beta is the beta coefficient after conditional analysis (for primary QTLs, it is identical to beta); cond.pval is the p-value after conditional analysis (for primary QTLs, it is identical to pval), A1 is the effect allele; rsid is the rs id of the allele matching in 1000 Genome Phase 3.

Sheet 5: Enrichment of RNA binding protein (RBP) sites within cell-type specific sQTLs. PThresh is the p-value threshold used for enrichment; OR is the odd ratio; Pvalue is enrichment p-value; Beta is the beta coefficient after enrichment test via GARFIELD<sup>50</sup>; SE is the standard error; CI95\_lower is the lower bound of 95% confidence interval; CI95\_upper is the upper bound of 95% confidence interval; NAnnotThesh is the is the number of annotated variants at the p-value threshold; NAnnot is the total number of variants after pruning; NThresh is the number of variant passing p-value threshold after pruning; N is the number of variants remained after pruning; linkID is the ID in annotation file; Annotation is the RNA-binding protein; Celltype is the cell type used for enrichment test.

**Table S4**, related to Figure 4 and 5: Colocalization of GWAS for neuropsychiatric disease and other brain related traits with cell-type specific e/sQTLs and fetal bulk e/sQTLs: e/sQTLsnp is the e/sSNP; inibeta is the beta coefficient before conditioning on GWAS SNP; pval is the nominal p-value prior to conditional analysis, gene/intron is the ensemblID of gene/intron junction associated



with the e/sSNP; Condbeta is the beta estimate of e/sQTL after conditional analysis; Condpval is the p-value after conditional analysis; r2 is the linkage disequilibrium (LD)  $r^2$ ; pop is the population used to estimate LD  $r^2$  (European population, with “European” or the population used in the QTL study with “Study”); symbol of the symbol of the gene (for eQTLs); biotype is the biotype of the gene for eQTLs; trait is the trait for GWAS; trait is the GWAS study; A1 is the effect allele for e/sQTL index SNP; GWASsnp is the variant e/sSNP colocalized with; rsid is the rs id of the allele matching in 1000 Genome Phase 3.

**Table S5**, related to Figure 6, S8-10:

Sheet 1-8: List of cell-type specific/fetal bulk/adult bulk TWAS gene and introns for neuropsychiatric disease and other brain related traits. Output from FUSION<sup>79</sup>: ID is the gene ensemblID or intron id; CHR is the chromosome number; HSQ is the heritability; BEST.GWAS.ID is the GWAS SNP in the locus with the most significant association; BEST.GWAS.Z is the z-score of the best GWAS SNP; EQTL.ID is the best e/sQTL in the locus; EQTL.R2 is the cross-validation  $R^2$  of the best e/sQTL in the locus; EQTL.Z is the z-score of the best e/sQTL in the locus; EQTL.GWAS.Z is the GWAS Z-score for this e/sQTL; NSNP is the number of SNPs in the locus; NWGT is the number of snps with non-zero weights; MODEL is the best performing model; MODEL.CV.R2 is the the cross-validation  $R^2$  of the best performing model; MODEL.CV.PV is the p-value from the cross-validation of the best performing model; TWAS.Z is the TWAS z-score; TWAS.P is the TWAS p-value; trait is the GWAS trait; pop is the population used to estimate LD; joint\_independent is the status if a gene/intron jointly independent (YES, if it is independent; NO, if it is not independent; NA, if it was not tested for the trait).

Sheet 9-10: Summary of heritability (p-value < 0.01) and cross validation  $r^2$  from prediction models across cell-type specific/fetal bulk/adult bulk for gene and intron TWAS: hsq is the mean heritability of the genes/introns; hsq.se is the mean standard error of estimated heritability; hsq.pv

is the mean p-value of the heritability; emmax.rsq is the mean cross-validation  $R^2$  training via EMMAX with p-value as emmax.pval; lasso.rsq is mean the cross-validation  $R^2$  via LASSO with p-value as lasso.pval; enet.rsq is mean the cross-validation  $R^2$  via elastic net with p-value as enet.pval; blup.rsq is mean the cross-validation  $R^2$  via BLUP with p-value as blup.pval; bsimm.rsq is the mean cross-validation  $R^2$  via BSLMM with p-value as bsimm.pval; top1.rsq is the mean cross-validation  $R^2$  via standard marginal e/sQTL Z-scores computation with p-value as top1.pval. 95 % confidence intervals per parameter are shown their below.

Sheet 11-12: SCZ TWAS for GTEx Brain frontal cortex and downsampled fetal bulk data. Output from FUSION<sup>Z8</sup>: PANEL: Data type; ID is the gene ensemblID or intron id; CHR is the chromosome number; HSQ is the heritability; BEST.GWAS.ID is the GWAS SNP in the locus with the most significant association; BEST.GWAS.Z is the z-score of the best GWAS SNP; EQTL.ID is the best e/sQTL in the locus; EQTL.R2 is the cross-validation  $R^2$  of the best e/sQTL in the locus; EQTL.Z is the z-score of the best e/sQTL in the locus; EQTL.GWAS.Z is the GWAS Z-score for this e/sQTL; NSNP is the number of SNPs in the locus; NWGT is the number of snps with non-zero weights; MODEL is the best performing model; MODEL.CV.R2 is the the cross-validation  $R^2$  of the best performing model; MODEL.CV.PV is the p-value from the cross-validation of the best performing model; TWAS.Z is the TWAS z-score; TWAS.P is the TWAS p-value; trait is the GWAS trait.
